# Supplementary material for: CD36 neutralisation blunts TLR2-IRF7 but not IRF3 pathway in neonatal mouse brain and immature human microglia following innate immune challenge
Source: PubMed Central journal article supplement (PMC9911392; doi:10.1038/s41598-023-29423-0), 2023-02-09

Fig. 2: Blots for western blot fig 4

Blots for Iba-1 and TLR-2 were cut pre-hybridisation.

Similarly blots for TLR3 and IRF7 were cut and TLR-4 and p-p65 were cut.

### Iba-1

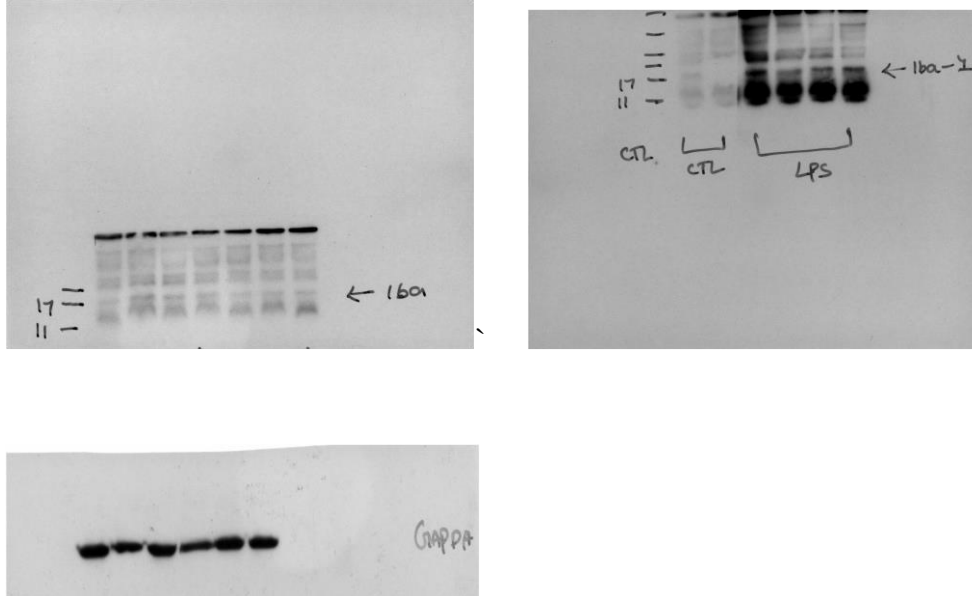

### TLR2

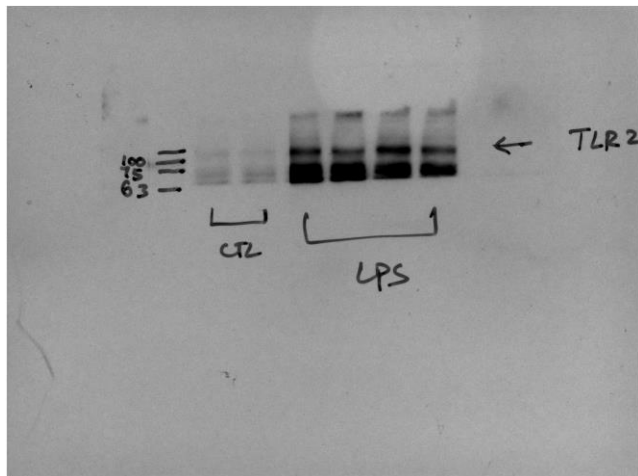

TLR3

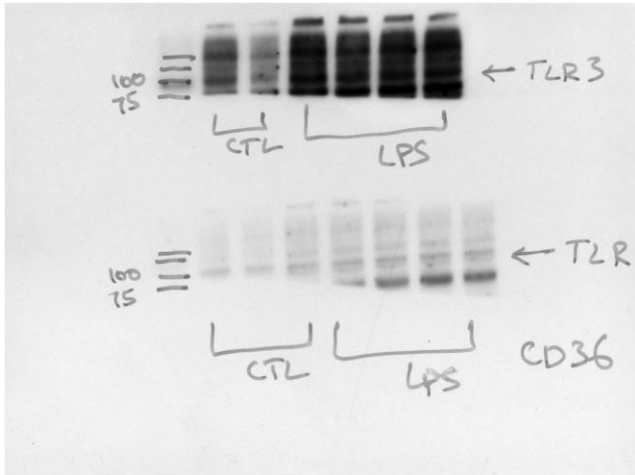

GAPDH

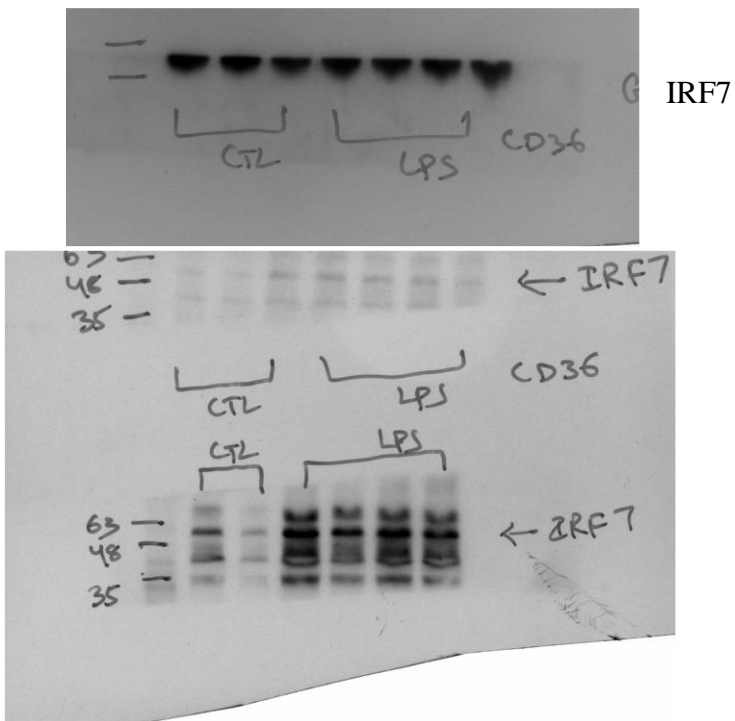

IRF3 (rev)

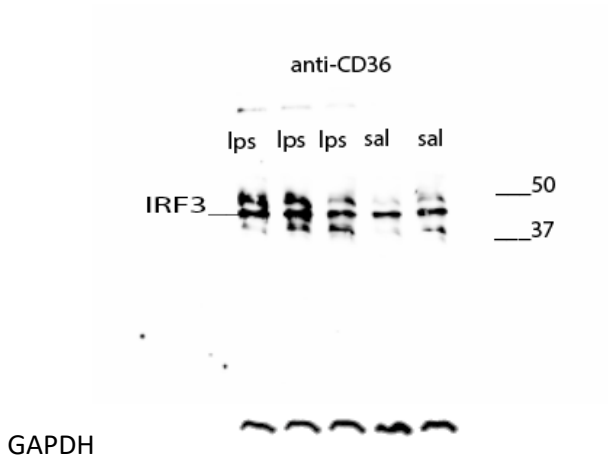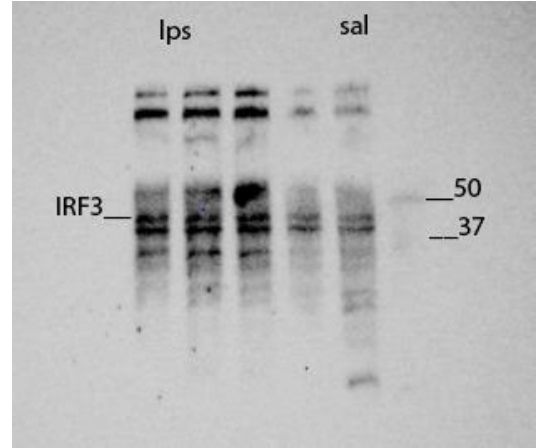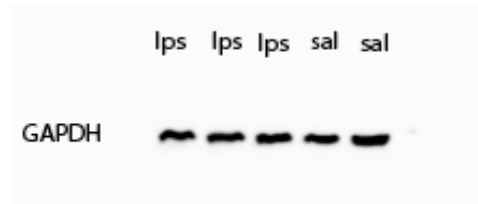

IRF3

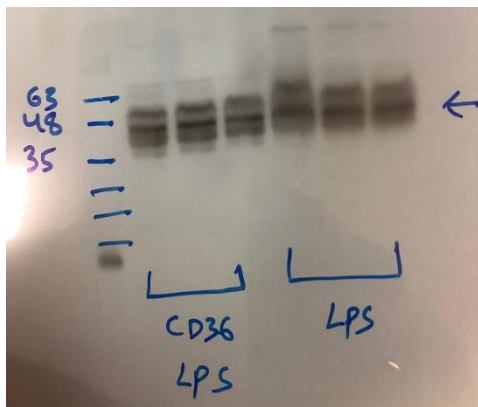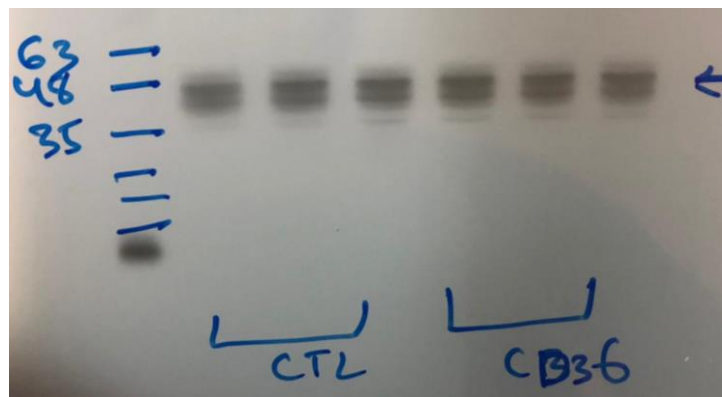

GAPDH for IRF3

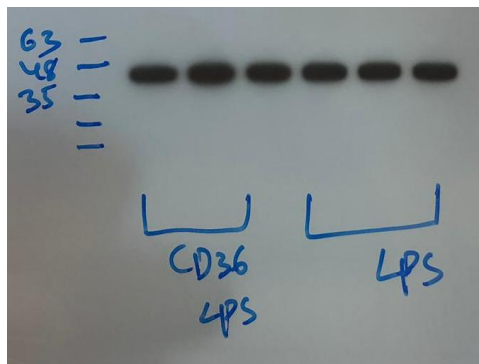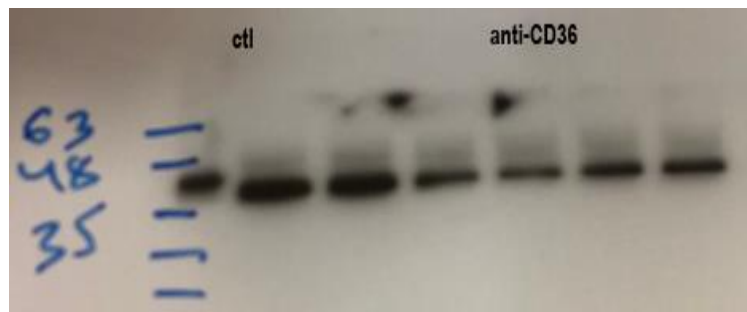

Inos

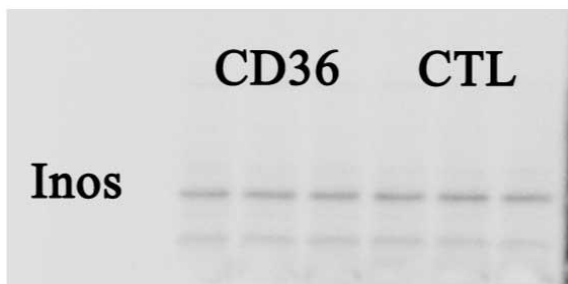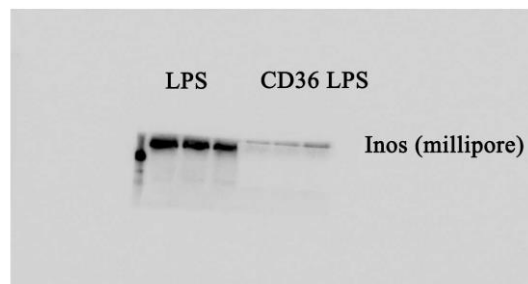

P-p65

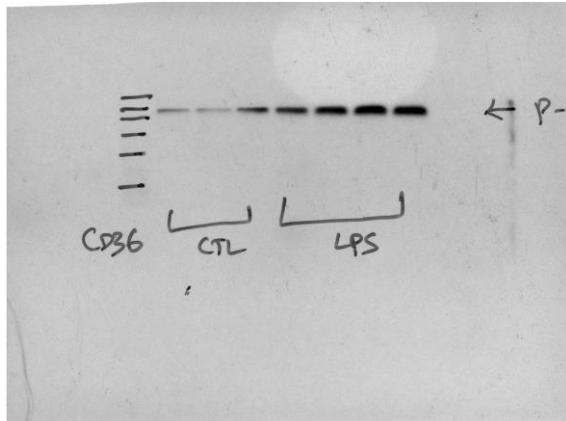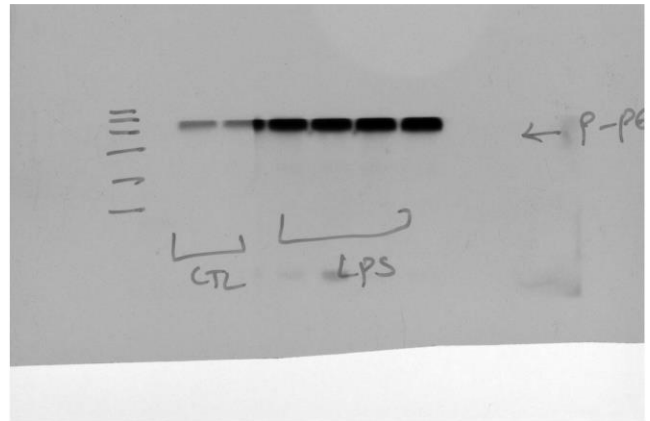

GAPDH for P-p65

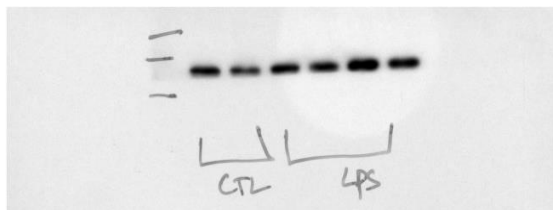

TLR4

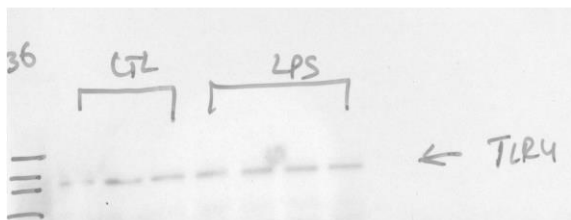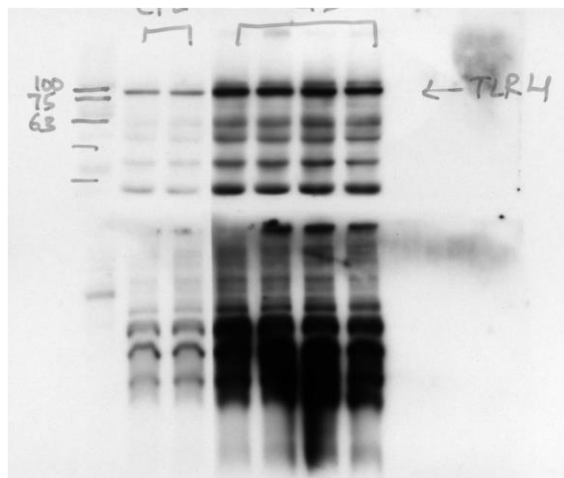

GAPDH for TLR4 and p-p65

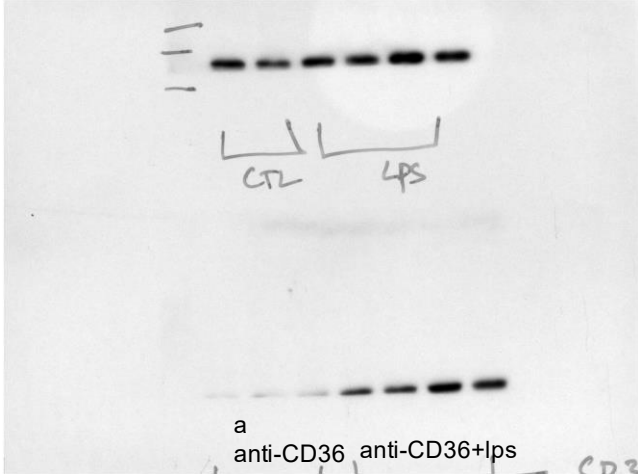

Fig. 3: Blots for figure 5 HMC lysates

Membranes for Iba-1 and TLR3 (anti-CD36, anti-CD36+LPS), were cut post-transfer.

Similarly, membranes for TLR2, p65 (ctl, lps), TLR 4 and IRF7 (anti-cd36, anti-cd36+lps)

IRF7 and TLR3 (ctl, lps) were prepared.

The blots were analysed on BioRad ChemiDoc at various exposure times.

### Iba-1

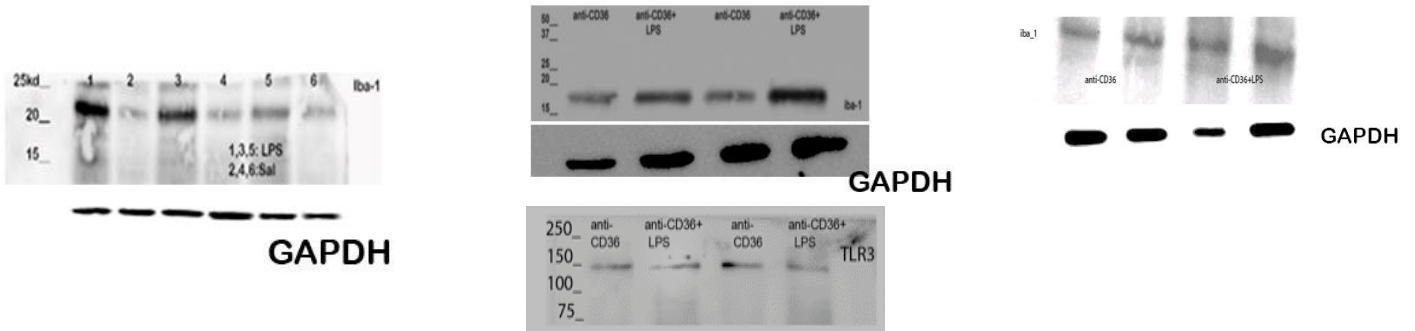

### TLR 3

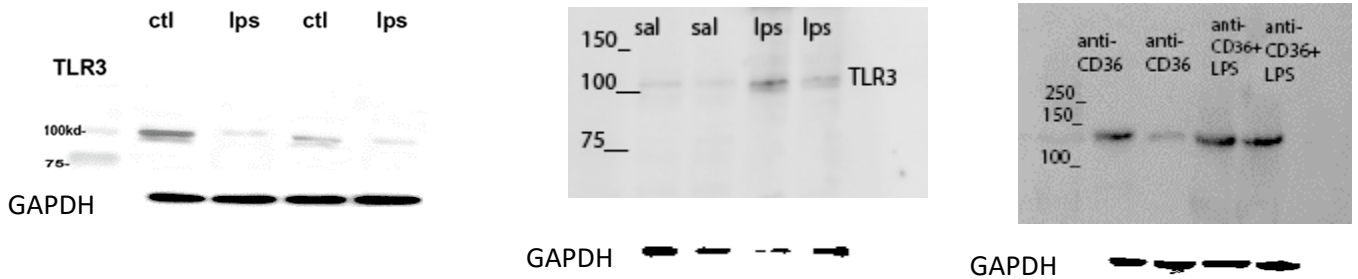



TLR-2

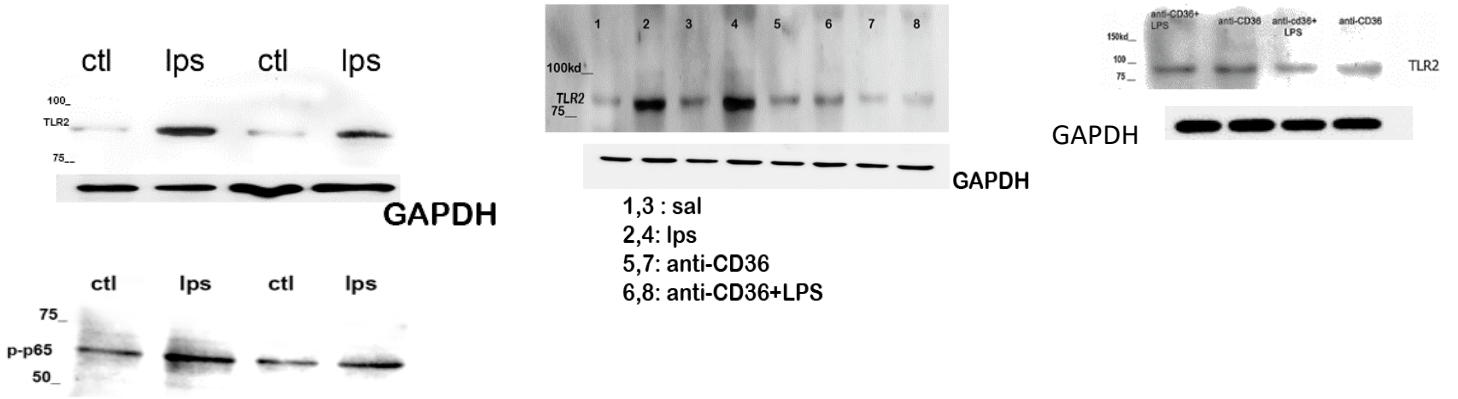

IRF-7

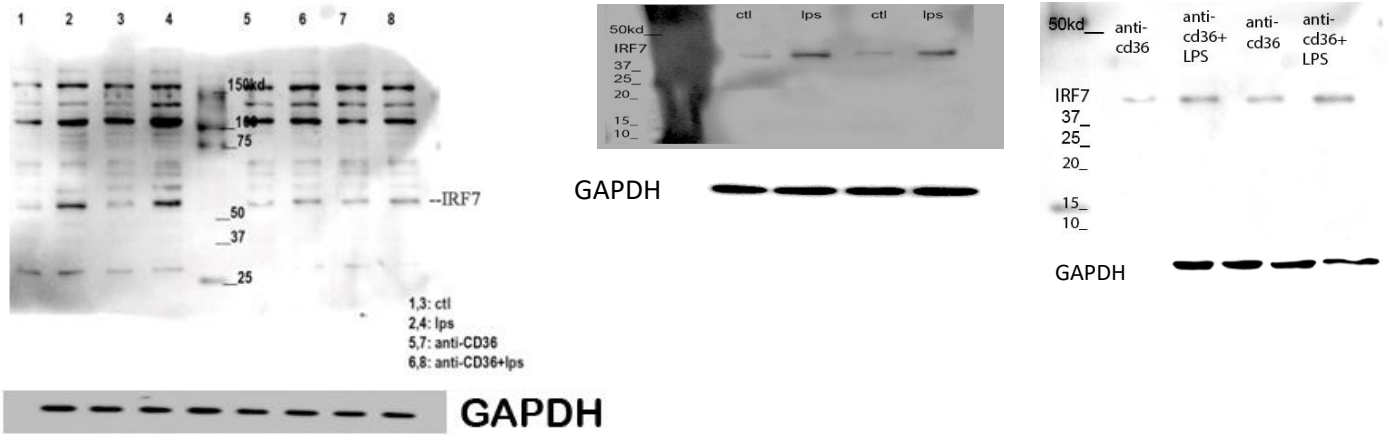

### IRF3

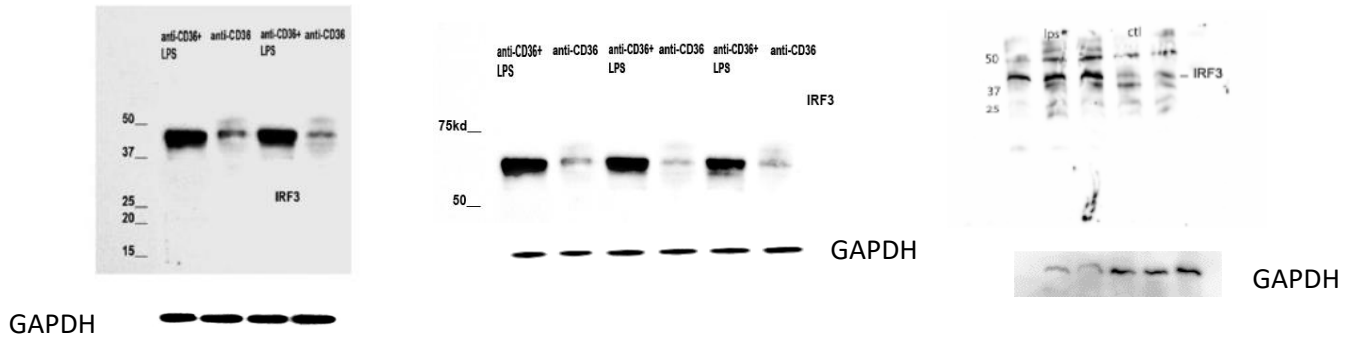

### TLR4

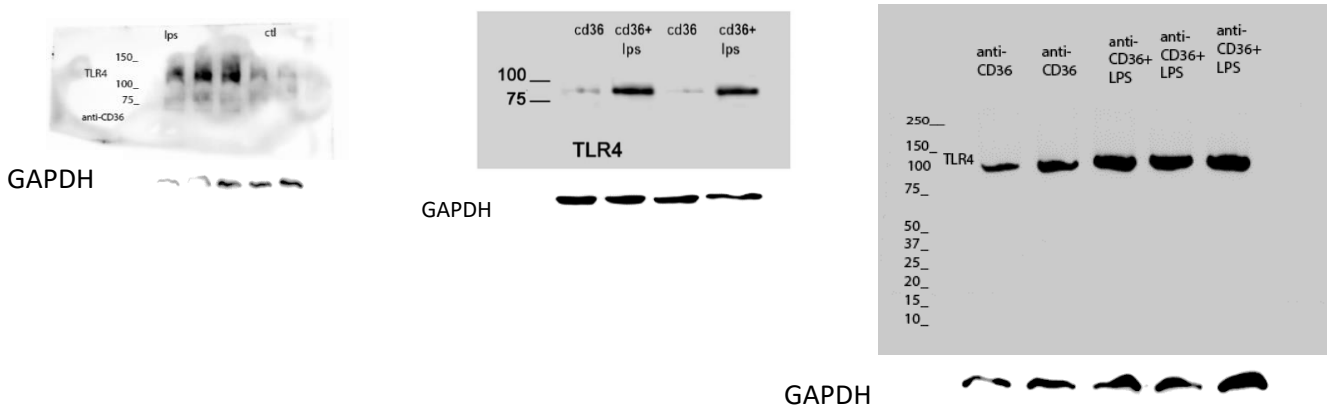

### Inos

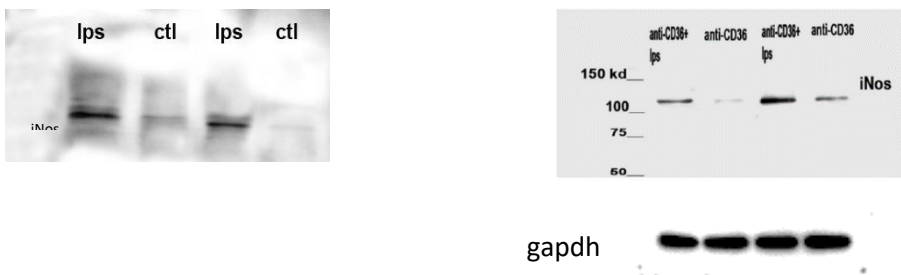

Supplement: 41598_2023_29423_MOESM1_ESM.pdf [file 41598_2023_29423_MOESM1_ESM.pdf]
